# Supplementary material for: Detection of chemical warfare simulants by phosphorylation of a coumarin oximate
Source: Royal Society of Chemistry journal article supplement (doi:10.1039/b609861d), 2006-01-01
Supplement: b609861d.pdf [file b609861d.pdf]

## Supporting Information

Karl J. Wallace<sup>a</sup>, Ruth I. Fagbemi<sup>a</sup>, Frantz J. Folmer-Andersen<sup>a</sup>, Jeroni Morey<sup>\*b</sup>, Vincent M. Lynch<sup>a</sup>, and Eric V. Anslyn<sup>\*a</sup>

a) Department of Chemistry and Biochemistry, University of Texas at Austin, Austin, Texas, USA

b) Departament de Química, Universitat de les Illes Balears, 07122 Palma de Mallorca, Spain.

### Synthetic Procedure

**General:** <sup>1</sup>H and <sup>13</sup>C NMR spectra were recorded on a Varian Unity Plus 300 spectrometer in DMSO-*d*<sub>6</sub>. Chemical shifts are reported in parts per million (δ) downfield from tetramethylsilane (0 ppm) as the internal standard and coupling constants (*J*) are recorded in Hertz (Hz). The multiplicities in the <sup>1</sup>H NMR are reported as (br) broad, (s) singlet, (d) doublet, (dd) doublet of doublets, (ddd) doublet of doublet of doublets, (t) triplet, (sp) septet, (m) multiplet. All spectra are recorded at ambient temperatures. UV-vis experiments were performed on a Beckman DU-70 UV-Vis spectrometer and Fluorescence experiments were carried out on a PTI fluorimeter. Low and High-resolution mass spectra were measured with a Finnigan TSQ70 and VG Analytical ZAB2-E instruments, respectively. Stopped-flow Experiments were carried out on A KinTek Stopped-Flow apparatus (Model SF-2001, KinTek Corp., Austin, TX).

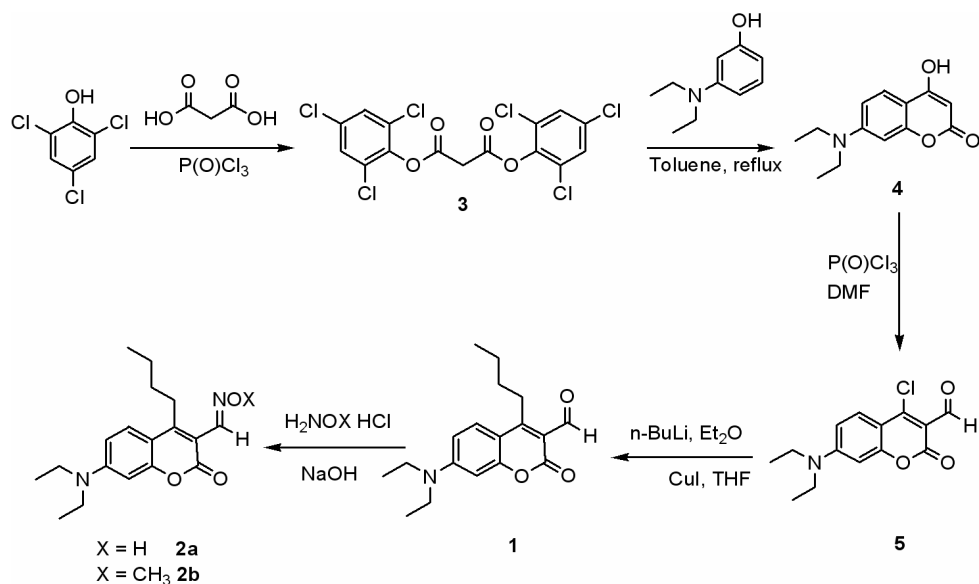

**Preparation of Magic Malonate (3)<sup>1</sup>:** To a 100 mL RBF were added malonic acid (0.52 g, 5.0 mmol), 2,4,6-trichlorophenol (1.58 g, 8.0 mmol) and P(O)Cl<sub>3</sub> (1 mL, 1.645 g, 10.5 mmol). The flask was topped with a CaSO<sub>4</sub> drying tube and was heated to 100 °C for 4 h with constant stirring. After this time, the reaction was slowly poured into 75 mL CH<sub>2</sub>Cl<sub>2</sub> and washed with iced, saturated NaHCO<sub>3</sub> solution (3 × 100 mL). The organic layer was then dried over Na<sub>2</sub>SO<sub>4</sub> and concentrated to yield a white solid (1.70 g, 92% yield). <sup>1</sup>H NMR (CDCl<sub>3</sub>) δ 7.27 (s, 2H), 4.13 (s, 1H); <sup>13</sup>C NMR (CDCl<sub>3</sub>) δ 161.7, 142.6, 133.0, 129.7, 129.0, 40.0.

**Preparation of 7-(Diethylamino)-4-hydroxy-coumarin (4)<sup>1</sup>:** To a 500 mL RBF were added **1** (4.63 g, 10 mmol) and 3-diethylaminophenol (1.65 g, 10 mmol). Dry toluene (10 ml) was added and the reaction was brought to reflux with constant stirring for 2 h. After this period, the reaction was allowed to cool to room temperature and was filtered. The resultant grey solid was washed with toluene and dried under high vacuum. (1.28 g, 55% yield) <sup>13</sup>C NMR (CDCl<sub>3</sub>) δ 168.2, 166.9, 156.6, 151.6, 124.6, 108.8, 104.3, 97.1, 44.8, 12.5; LRMS (CI) 234 (100%) M+1.

**Preparation of 7-(Diethylamino)-4-chloro-3-formyl-coumarin (5)<sup>1</sup>:** To a 50 mL RBF was added **2** (1.05 g 4.5mmol) and anhydrous DMF (3.2 mL) The reaction was heated at 100 °C until homogenous and the solution was then stored at -4 °C for 3 h. After this time, large pale grey crystals had formed in the bottom of the flask. The reaction was set stirring under argon and P(O)Cl<sub>3</sub> (1.1 mL, 1.82 g) was added dropwise over a period of 5 min. After 30 min, the reaction was transferred to a separatory funnel and 100 mL CH<sub>2</sub>Cl<sub>2</sub> was added. The organic layer was washed with saturated NaHCO<sub>3</sub> solution (2 × 50 mL) and brine (50 mL), dried over Na<sub>2</sub>SO<sub>4</sub> and concentrated to give a dark oil. This was subjected to column chromatography (silica 1:1 hexanes:EtOAc) to give an orange solid (689 mg, 55% yield) <sup>1</sup>H NMR (CDCl<sub>3</sub>) δ 10.27 (2, 1H), 7.82 (d, *J* = 9.3 Hz, 2H), 6.69 (d, *J* = 10.2 Hz, 1H), 6.42 (d, *J* = 2.4 Hz, 1H), 3.50 (q, *J* = 7.2 Hz, 4H) 1.27 (t, *J* = 7.2 Hz, 6H); <sup>13</sup>C NMR (CDCl<sub>3</sub>) δ 187.2, 160.1, 156.7, 154.3, 129.5, 111.1, 110.8, 107.9, 96.8, 45.6, 12.7.

**Preparation of 7-(Diethylamino)-4-butyl-3-formyl-coumarin (1)<sup>1</sup>:** A suspension of CuI (99.99%) (0.30g, 1.8 mmol) was added to dry diethyl ether (20 mL) and cooled to 0 °C, to which n-BuLi (1.7 mL in 2 M pentane, 3.4 mmol) was added slowly over a 15 min period. The solution was then cooled to -78 °C (acetone/dry ice) and dry THF was

added. In a separate flask 4-chloro-7-diethylamino-3-formylcoumarin (**X**) (0.50 g, 1.8 mmol) was dissolved in dry THF (15 mL) and was added drop wise via a cannula over a 30 min period to the *n*-BuLi solution. The solution was continuously stirred and allowed to warm to room temperature. The solution was quenched with saturated NH<sub>4</sub>Cl. The aqueous layer was extracted several times into chloroform (3 × 75 mL). The organic layer was dried over MgSO<sub>4</sub>, filtered and the solvent removed. The orange oil was subjected to column chromatography (EtOAc/Hex 10:90) that gave coumarin **2a** as an orange solid (0.25 g, 55 % yield). <sup>1</sup>H NMR (CDCl<sub>3</sub>) δ 10.37 (s, 1H), 7.62 (d, *J* = 9.3 Hz, 1H), 6.66 (dd, *J* = 2.6, 9.3.2 Hz, 1H), 6.46 (d, *J* = 2.4 Hz, 1H), 3.46 (q, *J* = 7.2 Hz, 4H), 3.26 (t, *J* = 7.2 Hz, 2H), 1.65 (m, 4H) 1.23 (t, *J* = 7.2 Hz, 6H) 0.99 (t, *J* = 7.2 Hz, 3H); <sup>13</sup>C NMR (CDCl<sub>3</sub>) δ 190.8, 164.2, 164.1, 163.2, 157.2, 157.5, 152.5, 128.5, 111.7, 109.8, 108.5, 97.3, 45.0, 32.6, 27.5, 23.3, 13.8, 12.5.

**General preparation of Coumarin derivatives (2a) and (2b).** A suspension of coumarin **1** (200 mg, 0.7 mmol) in ethanol (15 mL) was added to a solution of either hydroxylamine hydrochloride or methoxylamine hydrochloride (1.4 mmol) and sodium hydroxide (1.4 mmol) in water (10 mL) and stirred at room temperature for 7 h. The solution was adjusted to pH 6 by the addition of glacial acetic acid and placed into an ice bath for 1 h. The yellow solid was filtered, washed once with a mixture of glacial acetic acid and water (50 mL, 10 : 1) and recrystallized from ethanol–water.

Characterization of **2a**: <sup>1</sup>H NMR (CDCl<sub>3</sub>) δ 8.58 (brs, 1H) disappears on D<sub>2</sub>O shake, 8.41 (s, 1H), 7.52 (d, *J* = 9.22 Hz, 1H), 6.63 (dd, *J* = 2.6, 9.22 Hz, 1H), 6.48 (d, *J* = 2.8 Hz, 1H), 3.44 (m, 4H), 3.01 (m, 2H) 1.62-1.43 (m, 4H) 1.22 (t, *J* = 6.92 Hz, 4H); 0.94 (m, 3H); <sup>13</sup>C NMR (CDCl<sub>3</sub>) δ 168.2, 164.1, 153.8, 146.2, 129.5, 119.0, 118.3, 109.9, 106.8, 51.0, 36.5, 31.6, 25.5, 16.1, 15.3; UV-Vis (DMSO, 409 nm λ=409 nm); CI-MS: *m/z* = [M]<sup>+</sup> 316; CI-HRMS: calcd for C<sub>18</sub>H<sub>24</sub>N<sub>2</sub>O<sub>3</sub> 316.178, found C<sub>18</sub>H<sub>24</sub>N<sub>2</sub>O<sub>3</sub> 316.177. X-Ray quality crystals were grown from slow evaporation of MeOH (*vide infra*).

Characterization of **2b**: <sup>1</sup>H NMR (CDCl<sub>3</sub>) 8.38s, (s, 1H), 7.51 (d, *J* = 9.22 Hz, 1H), 6.63 (dd, *J* = 2.6, 9.22 Hz, 1H), 6.48 (d, *J* = 2.8 Hz, 1H), 3.93 (s, 3H) 3.43 (m, 4H), 3.07 (m, 2H) 1.51-1.70 (m, 4H) 1.22 (t, *J* = 6.92 Hz, 6H); 1.0 (m, 3H); <sup>13</sup>C NMR (CDCl<sub>3</sub>) δ 169.0,

165.0, 165.0, 152.7, 146.1, 129.6, 119.5, 118.0, 111.4, 107.3, 52.1, 49.9, 35.5, 31.6, 24.5, 16.1, 13.3; UV-Vis (DMSO,  $\lambda = 410$  nm); CI-MS:  $m/z = [M+H]^+$  331; CI-HRMS: calcd for  $C_{19}H_{27}N_2O_3$  331.194, found  $C_{18}H_{24}N_2O_3$  331.194.

**General UV-Vis spectroscopic methods:** Solutions of **2a** and **2b** ( $2.5 \times 10^{-5}$  mol  $dm^{-3}$ ) were prepared in DMSO solution. Aliquots of DFP  $6.00$  mol  $dm^{-3}$  were added to a 1 mL UV-Vis cell. The UV-Vis spectrum was recorded after each addition. Figure S1 shows the UV-Vis spectra of A) coumarin **2a** and **2a** (oximate) and B) coumarin **2b** on the addition of DFP. The spectra overlay indicating that the protected coumarin does not undergo phosphorylation.

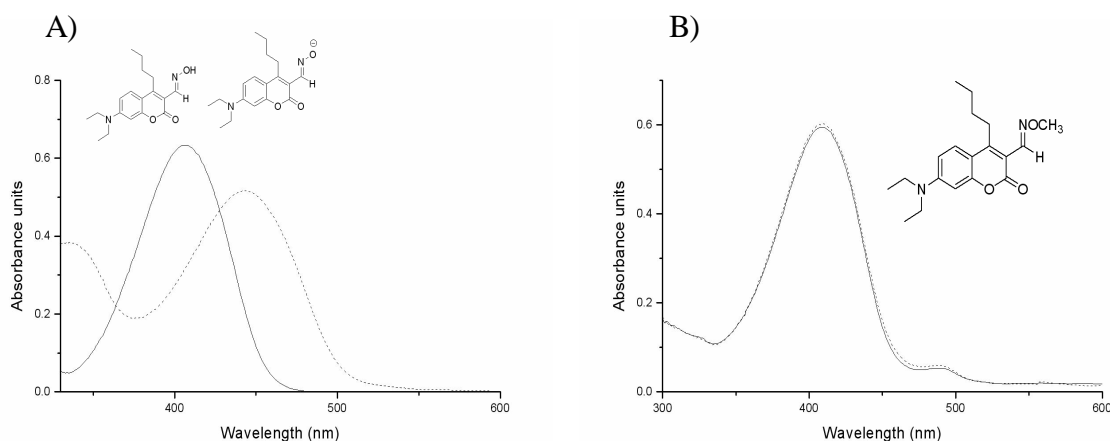

Figure S1: UV-Vis Spectra of A) **2a** and **2a**(oximate) B) **2b** model coumarin.

**General fluorescence spectroscopic methods:** Solutions of **2a** and **2b** ( $2.5 \times 10^{-6}$  mol  $dm^{-3}$ ) were prepared in DMSO solution. The solution was excited at 410 nm and emission spectra were recorded between 425 and 600 nm. An excess of DFP  $6.00$  mol  $dm^{-3}$  was added to a 2 mL fluorescence cell. Notice that the fluorescence intensity is high and no quenching is seen on the addition of base and no spectral change is seen upon phosphorylation, (Figure S2).

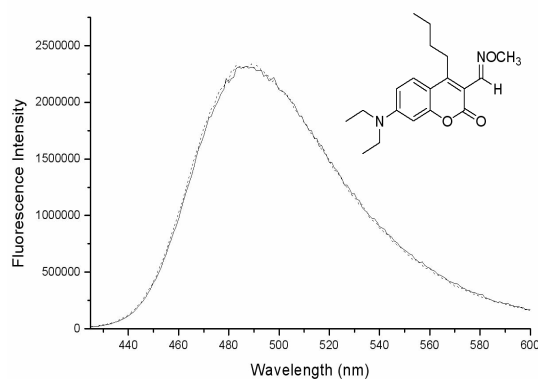

Figure S2: Coumarin model compound **2a** and the addition of excess DFP

**General Stop-Flow Method:** A  $2.5 \times 10^{-5}$  mol dm<sup>-3</sup> solution of either coumarin **2a** or **2b** was prepared in DMSO (containing P4 base) and 1 mL was transferred to syringe A (Figure S3) and a  $1.25 \times 10^{-4}$  mol dm<sup>-3</sup> solution of DFP was prepared in DMSO and 1 mL transferred to syringe B (Figure S3). Upon mixing equal volumes the fluorescence spectra was recorded for 4 seconds ( $\lambda_{\text{ex}} = 410$  nm). The straight line kinetic trace was seen when equal volumes of **2b** and DFP were mixed (Figure S4).

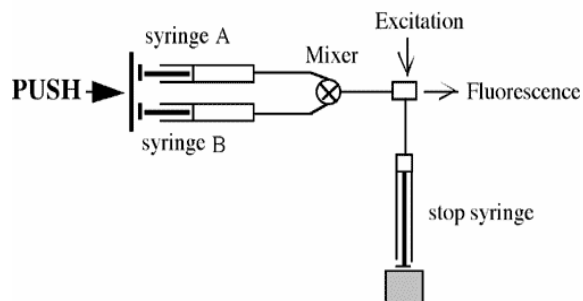

Figure S3: A typical experimental set up for stopped-flow kinetics

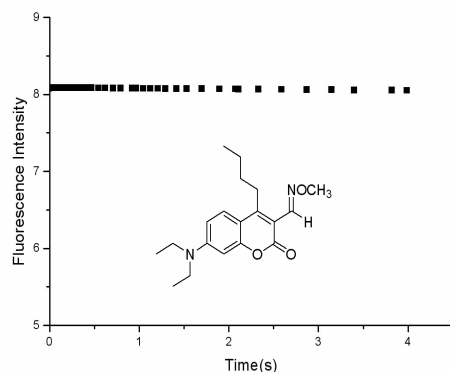

Figure S4 Kinetic-trace of model coumarin 2b on phosphorylation with DFP

**X-Ray Crystallography** for  $C_{18}H_{24}N_2O_3$ : Crystals grew as orange lathes by slow evaporation from methanol. The data crystal was cut from a larger crystal and had approximate dimensions; 0.27 x 0.20 x 0.04 mm. The data were collected on a Nonius Kappa CCD diffractometer using a graphite monochromator with MoK $\alpha$  radiation ( $\lambda = 0.71073\text{\AA}$ ). A total of 270 frames of data were collected using  $\omega$ -scans with a scan range of  $1^\circ$  and a counting time of 216 seconds per frame. The data were collected at 153 K using an Oxford Cryostream low temperature device. Details of crystal data, data collection and structure refinement are listed in Table 1. Data reduction were performed using DENZO-SMN.<sup>2</sup> The structure was solved by direct methods using SIR97<sup>3</sup> and refined by full-matrix least-squares on  $F^2$  with anisotropic displacement parameters for the non-H atoms using SHELXL-97.<sup>4</sup> The hydrogen atoms on carbon were calculated in ideal positions with isotropic displacement parameters set to 1.2xUeq of the attached atom (1.5xUeq for methyl hydrogen atoms). The hydrogen atoms on the oxime oxygen atoms were observed in a  $\Delta F$  map and refined with isotropic displacement parameters. The function,  $\sum w(|F_o|^2 - |F_c|^2)^2$ , was minimized, where  $w = 1/[(\sigma(F_o))^2 + (0.02*P)^2]$  and  $P = (|F_o|^2 + 2|F_c|^2)/3$ .  $R_w(F^2)$  refined to 0.141, with  $R(F)$  equal to 0.0786 and a goodness of fit,  $S$ , = 1.14. The data were corrected for secondary extinction effects. The correction takes the form:  $F_{corr} = kF_c/[1 + (2.6(3) \times 10^{-6}) * F_c^2 \lambda^3/(\sin 2\theta)]^{0.25}$  where  $k$  is the overall scale factor. Neutral atom scattering factors and values used to calculate the linear

absorption coefficient are from the International Tables for X-ray Crystallography (1992).<sup>5</sup>

### References:

- (1) Feuster, E. K.; Glass, T. E. *J. Am. Chem. Soc* **2003**, *125*, 16174-16175.
- (2) Otwinowski, Z.; Minor, W. *Macromolecular Crystallography, part A* **1997**, *276*, 307-326.
- (3) Altomare, A.; Burla, M. C.; Camalli, M.; Cascarano, G. L.; Giacovazzo, C.; Guagliardi, A.; Moliterni, A. G. G.; Polidori, G.; Spagna, R. *J. Appl. Cryst* **1999**, *32*, 115-119.
- (4) Sheldrick, G. M.; SHELXL97 ed.; Program for the Refinement of Crystal Structures.: University of Gottingen, Germany, 1994.
- (5) Wilson, J. C. In *International Tables for X-ray Crystallography*: Boston, 1992, pp Tables 4.2.6.8 and 6.1.1.4,.
